# Supplementary material for: Multi-omics analysis of kidney tissue metabolome and proteome reveals the protective effect of sheep milk against adenine-induced chronic kidney disease in mice
Source: Royal Society of Chemistry journal article supplement (doi:10.1039/d4fo00619d), 2024-01-01
Supplement: d4fo00619d1.xlsx [file d4fo00619d1.xlsx]

## Sheet: Body weight
	Con										Ad										Sheep
0	21.894	23.879	21.416	22.455	21.995	21.86	22.799	22.699			23.71	22.176	21.664	23.488	21.962	21.734	22.374	21.528			22.254	21.482	23.682	23.573	21.756	23.576	21.569	22.578	22.032	21.211
0.5	22.815	23.814	23.087	22.358	22.181	22.802	22.648	22.865	22.847	23.569	22.365	23.072	22.519	21.131	21.736	20.742	21.684	22.013			20.745	21	22.362	22.699	20.8	22.791	19.205	22.072	19.952
1	23.384	22.787	22.871	23.217	22.195	22.347	22.647	22.84	22.442	22.864	22.267	22.572	21.742	20.34	21.122	20.776	20.777	21.523			20.848	20.3	22.108	22.506	23.473	20.833	20.269	20.163	19.919	19.37
1.5	24.219	22.91	23.188	23.903	22.227	23.081	22.229	22.834	23.814	23.972	19.424	20.217	21.009	19.106	19.889	19.612	18.816	19.255	20.706	20.021	19.749	19.994	21.623	20.152	20.016	21.998	19.304	18.656	19.538
2	23.104	24.522	23.637	24.304	22.664	23.456	24.284	23.644			20.472	19.087	20.646	18.715	18.283	18.009	20.075	18.835	19.509	19.773	19.703	19.474	19.997	21.402	21.678	20.118	18.576	18.123	19.124
2.5	24.673	23.715	25.301	24.392	23.434	23.025	23.448	23.984	24.978	24.745	17.63	18.744	16.753	18.811	17.308	19.417	16.955	16.408	18.006	17.5	18.609	18.123	20.375	19.346	19.48	20.912	17.696	16.978	17.305
3	24.682	23.628	25.115	25.832	23.499	23.632	24.342	23.864	25.323	25.732	17.124	16.224	16.625	17.583	16.686	16.127	15.265	16.138	16.707		18.107	17.603	19.355	20.723	18.978	20.201	17.614	16.523	16.952
3.5	25.119	23.797	25.912	25.14	23.485	23.435	23.595	23.846	24.499	25.029	16.35	15.744	16.389	16.092	16.63	15.494	15.408	15.465	15.792		16.403	16.248	17.327	18.292	16.876	17.512	16.038	15.316
4	25.381	24.331	26.6	25.806	25.918	25.089	24.534	24.252	23.885	24.141	14.912	15.732	14.93	15.842	14.662	16.046	14.602	15.746	15.652		15.445	16.186	17.128	16.922	16.299	16.255	15.412	15.31	15.324

## Sheet: intake 
	Con					Ad					Sheep					Goat
0.5	3.53125	3.61075	2.97863	3.13937	3.586	2.30788	2.88362	2.18388	1.89512	2.94787	2.5645	2.5465	2.33763	2.32262	2.25975
1	3.4275	3.60083	2.90383	3.15083	3.43683	2.5855	2.14967	2.5985			2.5585	2.46	2.366	1.79483	1.813
1.5	3.52687	4.05063	3.25062	3.80925	3.495	2.33725	1.99513	2.67425	2.6705		2.65675	2.17512	2.46775	1.83575
2	3.23367	3.7645	3.72783	3.6268		2.544	2.403	2.503	2.46738		2.49417	2.4565	2.43133	2.63375
2.5	3.5256	3.28267	3.38793	3.4255		2.1008	2.0348	2.2496	2.40053	2.15373	2.39307	2.1168	2.89227	2.0066	1.90973
3	3.7225	3.58312	4.23567	3.63521		2.134	2.56317	2.23317			1.98683	2.004	3.13	1.45683	1.52583
3.5	3.47592	4.58633	3.34507	4.77686		2.84813	1.7047	2.029	2.20492		1.767	2.18483	2.19867	1.69287
4	3.56612	4.05275	3.38512	4.19187	3.58312	2.29537	2.17383	2.379	2.24433		1.73325	1.86413	2.33975

## Sheet: Serum indicators
		CON									Ad									Sheep
BUN		26.0512	19.1996	16.9708	22.4168	17.6176	20.5744	19.1996	20.8964	23.45	53.5528	56.154	44.9092	60.0964	52.472	57.6744	59.9844			31.8696	41.1488	42.308	47.992	30.6572	50.0948
creatinine		14.004	11.074	11.893	14.585	13.278	11.889	10.348	14.004	13.962	25.613	25.49	36.756	34.055	28.493	35.531	40.851	19.369		17.073	22.654	29.452	19.614	22.771	27.768	14.84	24.878
magnesium		0.5	0.53	0.51	0.51	0.5					1.05	1.18	1.3							0.82	0.89	0.99	0.78
potassium		6.158	5.67	4.454	5.13	5.102					6.356	8.444	9.214							5.038	6.514	4.956	5.794
SOD		339.62	360.85	339.62	344.93	343.6					278.6	267.98	273.29	271.96	289.21					318.4	302.38	325.03	311.76	304.32
MDA		3.75	4.38	4.38	4.06	4.06					5.31	6.25	7.19	5.94	5.63					5	5.31	5	5.31	5.63
GSH		305.32	240	268.86	243.04	200.51					144.3	154.94	170.13	174.68	170.13					215.7	241.52	240	212.66	188.35
CAT		5.81	4.28	4.61	3.61						1.3	1.14	1.1	1.06						2.52	2.23	2.06	2.18

## Sheet: Urinary indicators
									Ad						Sheep
Urinary volume	1.2	0.8	1.3	1.1	1	1.2	1.5	0.7	3.3	3.3	3.6	3.4	2.7	2.8	2.5	3.1	2.1	2.5	1.8	1.7
urinary creatinine	73.3	76.9	86.7	107.4	112.8	113.9			154.8	155.9	161.2	161.6	167.2	170	125.5	129.4	132.6	143.2	145.1	149.3
uric acid	142	143	108	104	151	103			207	171	170	158	246	152	118	120	105	106	119	114
albumin	2.9	2.5	2.8	2.7					1.7	1.9	1.6	2	1.1		1.6	1.8	1.5	2.2	1.5	2.5205
KIM-1	400.641	486.783	247.202	248.74	172.597	222.205			1775.83	1594.7	1720.45	1726.99			1361.66	916.336	862.113	1448.18	1570.47
NGAL	118.328	118.904	102.781	125.238	121.207				190.304	173.605	197.213	163.241			102.925	149.422	152.876	162.089

## Sheet: mRNA
	Con					Ad					Sheep
Col1a1	0.977389	0.844989	1.02066	1.15696		20.275	15.158	17.8705			6.22039	7.34624	6.88603	2.90695
Fn1	0.863014	1.05821	1.21626	0.862516		24.0276	15.7792	19.1923	18.1885		6.72919	6.7253	4.26614	2.95356
Tgfβ	1.16515	1.26255	0.706541	0.973	0.89276	5.81795	7.68127	5.17423	4.27625	4.04557	1.34615	1.86781	1.84742	1.65635	2.92245
VCAM1	1.01313	0.758987	1.00555	1.22234			25.1586	29.988	42.9766	20.8886	15.9131	7.57098	14.1524	14.2344
ICAM1	1.04776	1.24169	0.833049	0.877501		6.18228	8.55325	8.30976	6.42623	6.45202	4.77546	2.53264	4.77546	3.74892
IL6	1.26653	1.7014	0.662834	0.469507	0.899723	43.816		37.3375	46.021	34.7166	6.83316	13.7138	8.07924	12.7511	5.30267
Tnfα	0.909397	0.979747	1.2083	1.04221	0.860342	21.2047	16.7236	12.0321	15.7395	12.8585	2.0965	4.40655	2.02743	2.44327	5.00365

## Sheet: fig 2
	CON								Ad							Sheep
Kidney weight	0.15	0.15	0.12	0.12	0.13	0.14	0.13		0.1	0.08	0.08	0.1	0.1			0.16	0.13	0.09	0.12	0.1	0.14	0.12
Kidney index	0.8032	0.5838	0.7091	0.6135	0.7382	0.7786	0.6526	0.9144	0.591	0.465	0.5016	0.558	0.4891	0.536	0.5385	0.7016	0.7263	0.7534	0.4968	0.6194	0.687	0.636	0.6176
interstitial collagen	4.345	1.6943	4.1738	6.46					12.0162	11.7134	11.539	15.2032	16.3863			5.35914	6.56117	7.084	10.3324	9.99833	5.51967
