# Supplementary material for: Multi-omics analysis of kidney tissue metabolome and proteome reveals the protective effect of sheep milk against adenine-induced chronic kidney disease in mice
Source: Royal Society of Chemistry journal article supplement (doi:10.1039/d4fo00619d), 2024-01-01
Supplement: d4fo00619d2.xlsx [file d4fo00619d2.xlsx]

## Sheet: Sheet1
	CON								Ad							Sheep
Kidney weight	0.15	0.15	0.12	0.12	0.13	0.14	0.13		0.1	0.08	0.08	0.1	0.1			0.16	0.13	0.09	0.12	0.1	0.14	0.12
Kidney index	0.8032	0.5838	0.7091	0.6135	0.7382	0.7786	0.6526	0.9144	0.591	0.465	0.5016	0.558	0.4891	0.536	0.5385	0.7016	0.7263	0.7534	0.4968	0.6194	0.687	0.636	0.6176
interstitial collagen	4.345	1.6943	4.1738	6.46					12.0162	11.7134	11.539	15.2032	16.3863			5.35914	6.56117	7.084	10.3324	9.99833	5.51967
