# Supplementary material for: Multi-omics analysis of kidney tissue metabolome and proteome reveals the protective effect of sheep milk against adenine-induced chronic kidney disease in mice
Source: Royal Society of Chemistry journal article supplement (doi:10.1039/d4fo00619d), 2024-01-01
Supplement: d4fo00619d3.xlsx [file d4fo00619d3.xlsx]

## Sheet: pos
ID

## Sheet: neg
ID
